# Supplementary material for: Effect of sol stabilizer on the structure and electronic properties of solution-processed ZnO thin films
Source: Royal Society of Chemistry journal article supplement (doi:10.1039/c5ra18642k), 2015-01-01
Supplement: c5ra18642k1.pdf [file c5ra18642k1.pdf]

## SUPPORTING INFORMATION

### **Effect of Sol Stabilizer on the Structure and Electronic Properties of Solution-Processed ZnO thin Films**

Ahmad Hossein Adl<sup>1</sup>, Piyush Kar<sup>1</sup>, Samira Farsinezhad<sup>1</sup>, Himani Sharma, and Karthik Shankar<sup>1,2</sup>

<sup>1</sup>Department of Electrical and Computer Engineering, University of Alberta, Edmonton, AB, T6G 2V4, Canada

<sup>2</sup>National Institute for Nanotechnology, National Research Council, 11421 Saskatchewan Drive, Edmonton, AB, T6G 2M9, Canada

#### **Table of contents**

|                                                                      |   |
|----------------------------------------------------------------------|---|
| Tafel plot                                                           | 2 |
| Nyquist Plots, Electrochemical Circuit Model and Mott-Schottky Plots | 3 |
| Chemistry of the sol formation process                               | 4 |
| Effect of sol-stabilizer on crystallographic orientation             | 5 |
| Ranking order of films based on extracted material parameters        | 6 |
| FTIR analysis                                                        | 7 |
| References                                                           | 8 |

### Tafel plots obtained from ZnO films

Tafel plots for the ZnO films, formed by using various stabilizers, are shown in Fig. S1. Data was obtained by scanning the potential between  $-0.8$  V (w.r.t. Ag/AgCl) to  $-0.025$  V, in a  $0.1$  M KCl (aqueous) electrolyte, at room temperature. Samples were prepared by wrapping parafilm all around, except for a  $0.5$  cm  $\times$   $0.5$  cm area that was exposed to the electrolyte. This sealing of the edges by an insulator limited measurement and analysis errors due to points of high electric field concentration. Open circuit potential values were between  $-0.5$  V and  $-0.3$  V, implying that ZnO films exhibit blocking behavior in that potential range.

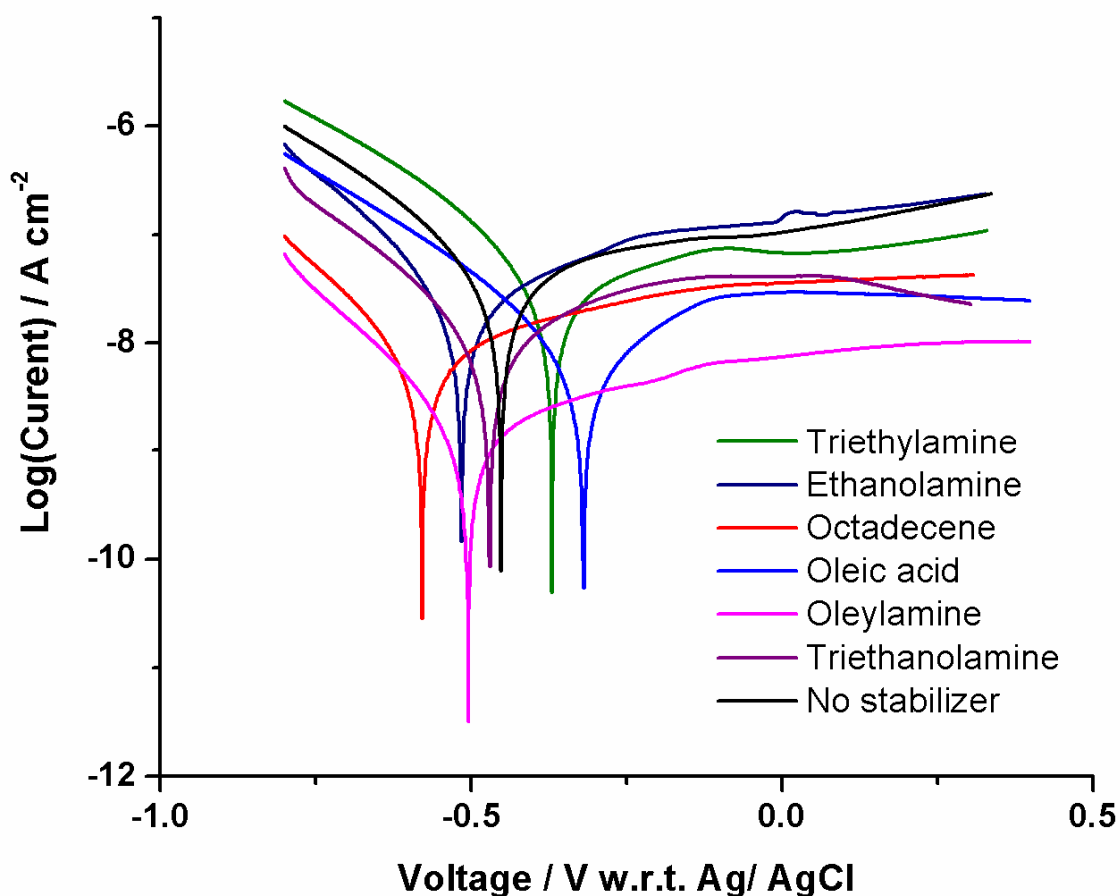

**Fig. S1.** Tafel plots for zinc oxide films grown with various stabilizers and also without stabilizer

## Charge carrier concentration measurement using EIS

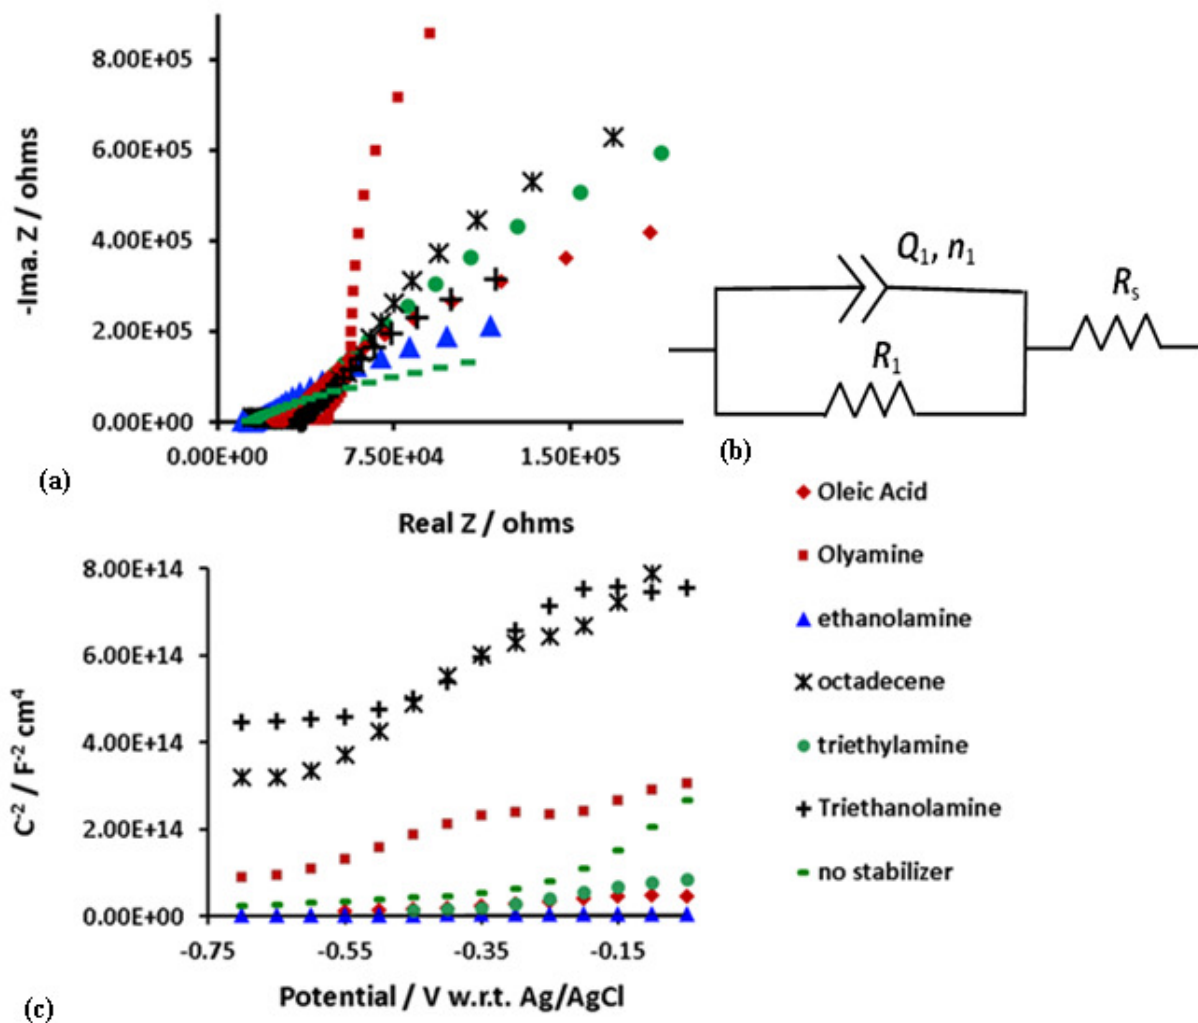

**Fig. S2** Nyquist plots (a), equivalent circuit model (b) and Mott Schottky's plot (c) for zinc oxide films grown with various stabilizers and also without stabilizer.

## Section S1: Chemistry of the sol formation process

Triethanolamine, ethanolamine and triethylamine cause hydrolysis and generate  $\text{OH}^-$  ions, as per *equation (1)*:

In *equation (1)*, “R” denotes triethanolamine, ethanolamine, and triethylamine

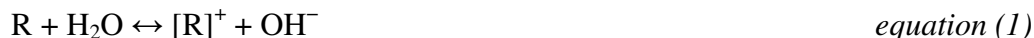

$\text{Zn}^{2+}$  from zinc acetate precursors react with  $\text{OH}^-$  ions forming  $\text{Zn}(\text{OH})_2$  ions, as per *equations (2), (3) and (4) [1 to 4]*:

Formation of zinc hydroxide:

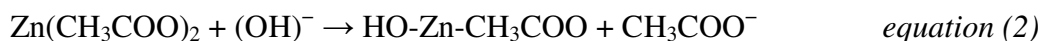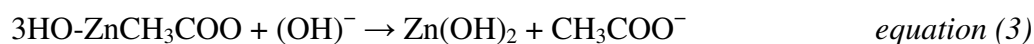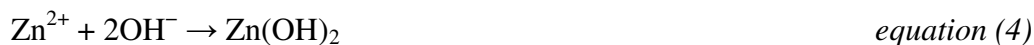

$\text{Zn}(\text{OH})_2$  precursors decompose to  $\text{ZnO}$  under hydrothermal conditions as per *equation (5)*

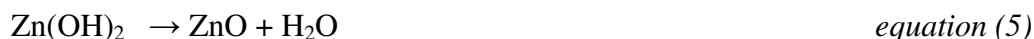

$\text{ZnO}$  forms complexes with amine bearing (primary amines) organic stabilizers [6] (e.g. triethanolamine, ethanolamine and triethylamine). For example, as shown in Fig. S3 (a), triethanolamine forms a complex with  $\text{ZnO}$

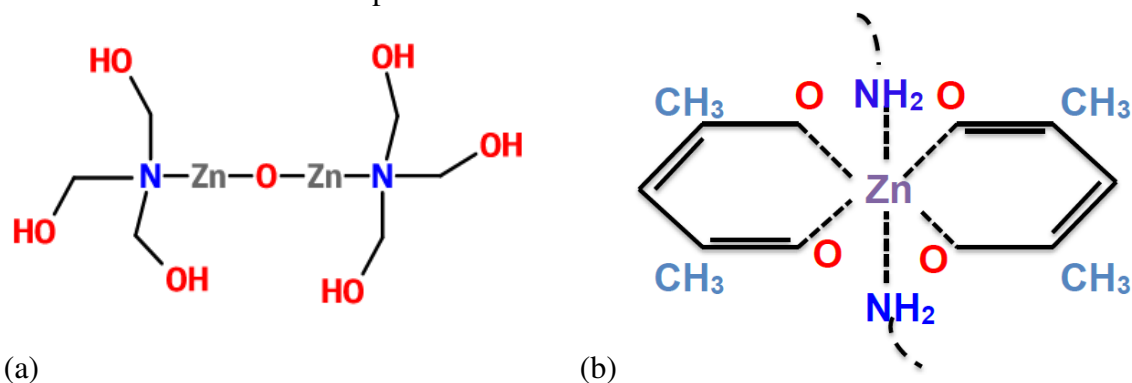

**Fig. S3** (a) Representative structure of Zinc oxide – triethanolamine complex [5], and (b) zinc acetate – oleylamine complex [7]

With oleylamine, zinc acetate forms a  $[\text{Zn}(\text{acetate})_2]$ -oleylamine complex (pictorial schematic shown in Fig. 2 (b)), which thermally decomposes to yield ZnO [7, 8].

With stabilizers like oleic acid and octadecene,  $\text{ZnO}(\text{OH})$  species, generated by hydrolysis reaction, react to form complexes. An example reaction for oleic acid is shown in *equation (6)* [8], where, the zinc oxide – oleic acid complex yields ZnO at temperature above 400 °C [9]

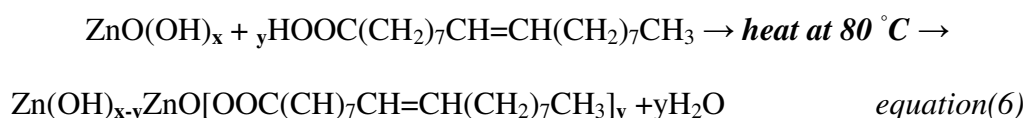

## **Section S2: Effect of sol-stabilizer on crystallographic orientation**

Preferred crystalline orientations are attained because of capping of growth of certain crystal planes and promoting the growth of others by stabilizers. Amine bearing small alkyl chain stabilizers, such as ethanolamine, triethanolamine and triethylamine function as complex forming agents that stabilize positively charged  $\text{Zn}^{2+}$  ions, and promote preferred crystalline orientation of ZnO along the c-axis by aiding polymerization of ZnO chains. This phenomenon is favored by the fast enough rate of hydrolysis, in order to generate ZnO to feed the formation process of orientated network of ZnO chains [2]. These stabilizers also provide a dense matrix for oriented crystal growth [10]. Other authors [11] state that amine bearing stabilizers (such as triethanolamine) aid in oriented agglomeration (by collision, rotation and oriented attachment) of ZnO and their growth.

Also notable is that stabilizers such as oleic acid and oleylamine have long alkyl chains that form complexes, which cap surfaces of the  $\text{Zn}^{2+}$  species restricting growth in certain directions. For instance, the coordinated complex formed by oleylamines are located at the top and at the bottom, which have chains of alkyl groups that interact by Van der Waal's forces, promoting formation of oriented two-dimensional ZnO crystals [12 - 14]. In case of octadecene, preferred crystalline orientation is not observed because it is not a coordinating solvent, and therefore no one crystal plane was favored as a growth direction [15]

**Table S1.** Ranking order of films based on value of material parameters and correlation to actual surface area

| <b>Ranking based on ratio of actual to geometric surface area</b> | <b>Photo to dark current ratio</b> | <b>Lifetime (s)</b>   | <b>Bulk mobility (cm<sup>2</sup> V<sup>-1</sup> s<sup>-1</sup>)</b> | <b>Doping (cm<sup>-3</sup>)</b> |
|-------------------------------------------------------------------|------------------------------------|-----------------------|---------------------------------------------------------------------|---------------------------------|
| Ethanolamine (13.8)                                               | Ethanolamine (90)                  | No stabilizer (42.3)  | No stabilizer (23)                                                  | Ethanolamine (4.7E18)           |
| Triethanolamine (8.4)                                             | No stabilizer (62.9)               | Ethanolamine (38.03)  | Octadecene (11)                                                     | No stabilizer (9.4E16)          |
| No stabilizer (6.5)                                               | Triethanolamine (40)               | Triethanolamine (34)  | Triethanolamine(10)                                                 | Triethanolamine (7E16)          |
| Triethylamine (4.67)                                              | Triethylamine (4.8)                | Triethylamine (32.34) | Triethylamine (2)                                                   | Triethylamine (7E16)            |
| Octadecene (2)                                                    | Octadecene (4.3)                   | Octadecene (25)       | Ethanolamine (7.8E-3)                                               | Octadecene (3.5E16)             |

### Section S3: FTIR analysis

FTIR spectra for the ZnO films is shown in Fig. 3. There we found that residual organic complexes are present on the resultant ZnO films. The peak intensities are similar for all the ZnO films and therefore we conclude that these organic residues contribute equally to the resistivity of the films. Peak at  $482\text{ cm}^{-1}$  corresponds to ZnO. [2, 16-19]. Intense peak at  $670\text{ cm}^{-1}$  corresponds to  $\text{CH}_2$  [5], and those at  $1010$ ,  $1100$  and  $1140\text{ cm}^{-1}$  may be ascribed to C-N bonds [20-24]. Peak at  $1365$  and  $1490$  correspond to C-O [2] and those at  $1580$ ,  $1610$  and  $1700$  correspond to C=O [2, 24]. Peak at  $2380\text{ cm}^{-1}$  is due to absorption of atmospheric  $\text{CO}_2$  [24, 25].

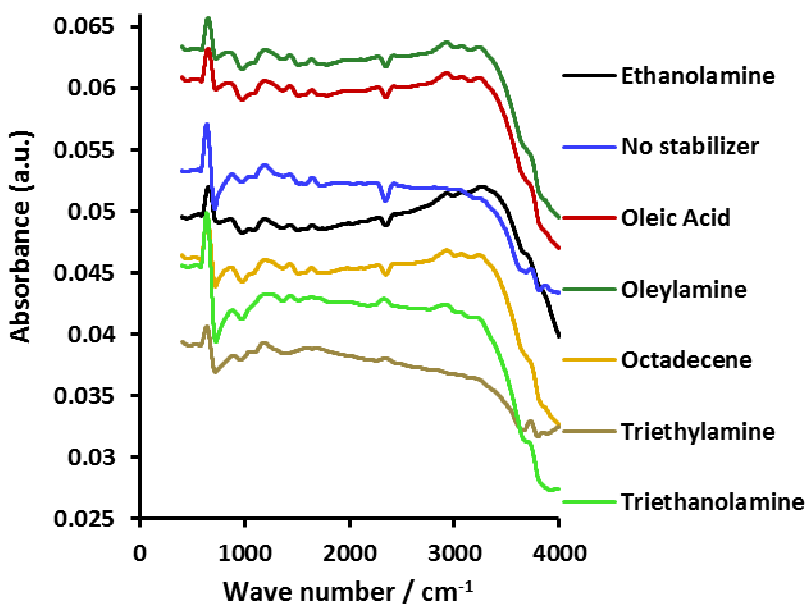

Fig. S4. Plots of FTIR data of ZnO films formed with various stabilizers

Table S2. Assignment of chemical groups the FTIR peaks exhibited by the ZnO films

| Peaks Position ( $\text{cm}^{-1}$ ) | Assignment       | Reference(s) |
|-------------------------------------|------------------|--------------|
| 482                                 | ZnO              | 2, 16-19     |
| 670                                 | C-H <sub>2</sub> | 2            |
| 1010                                | C-N              | 20-24        |
| 1100                                | C-N              | 20-24        |
| 1365                                | C-O              | 23           |
| 1490                                | C-O              | 23           |
| 1580                                | C=O              | 19, 23       |
| 1610                                | C=O              | 23           |
| 1700                                | C=O              | 2, 24        |
| 2300                                | O=C=O            | 23, 25       |
| 2950                                | C-H              | 2            |
| 3600                                | O-H              | 2, 23        |

## References

1. Sun et al "Alkali-dependent synthesis of flower-like ZnO structures with enhanced photocatalytic activity via a facile hydrothermal method" *Applied Surface Science*, 2012, vol. 258 (14), pp. 5455 to 5461
2. Vajargah et al, "Sol-gel derived ZnO thin films: Effect of amino-additives", *Applied Surface Science*, 2013, vol. 58 (Part B, 15), pp. 732 - 743
3. Cheng-Hsien Hsieh, "Spherical Zinc Oxide Nano Particles from Zinc Acetate in the Precipitation Method", *Journal of the Chinese Chemical Society*, 2007, vol. 54, pp. 31-34
4. Kaneva et al "ZnO thin films preparation on glass substrates by two different sol-gel methods", *Bulgarian Chemical Communications*, 2012, Volume 44, Proceedings of the IIIrd National Crystallographic Symposium (pp. 63-69)
5. Shokuhfar et al, "Synthesis of ZnO nanoparticles via sol-gel process using triethanolamine as a novel surfactant", 2008, *Defect and Diffusion Forum*, 2008, vols. 273-276, pp. 626 to 631
6. Kamal Hassan and Chandra, "Sol-gel synthesis of ZnO thin films", *Thin Solid Films*, 1996, vol. 288, pp. 112 to 115
7. Niasari et al, "Preparation of ZnO nanoparticles from [bis(acetylacetonato)zinc(II)]-oleylamine complex by thermal decomposition", *Materials Letters*, 2008, vol. 62(12), pp. 1890 to 1892
8. Zhang et al, "Modulation of the Morphology of ZnO Nanostructures via Aminolytic Reaction: From Nanorods to Nanosquamas", *Langmuir*, 2006, 22 (14), pp 6335-6340
9. Fu et al, "Stable Aqueous Dispersion of ZnO Quantum Dots with Strong Blue Emission via Simple Solution Route", *Journal of the American Chemical Society*, 2007, 129 (51), pp 16029-16033
10. Ohyama et al, "Sol-gel preparation of ZnO films with extremely preferred orientation along (002) plane from zinc acetate solution", *Thin Solid Films*, 1997, vol.306, pp. 78 to 85
11. Fu et al, "Single-crystal ZnO flocky sphere formed by three-dimensional oriented attachment of nanoparticles", *Journal of Physics and Chemistry of Solids*, 2008, Volume 69, Issue 4, April 2008, Pages 880-883
12. Turgeman et al, "Growing ZnO Crystals on Magnetite Nanoparticles", *Chemistry, A European Journal*, 2004, vol. 10, pp. 1845 to 1850
13. Fei Wang and Xudong Wang, "Mechanisms in the solution growth of free-standing two-dimensional inorganic nanomaterials", *Nanoscale*, 2014, vol. 6, pp. 6398 to 6414
14. Thanh-Dinh Nguyen and Trong-On Do (2011). Size- and Shape-Controlled Synthesis of Monodisperse Metal Oxide and Mixed Oxide Nanocrystals, Nanocrystal, Dr. Yoshitake Masuda (Ed.), ISBN: 978-953-307-199-2, InTech, Available from: <http://www.intechopen.com/books/nanocrystal/size-and-shape-controlled-synthesis-ofmonodisperse-metal-oxide-and-mixed-oxide-nanocrystals>
15. Andleman et al, "Morphological Control and Photoluminescence of Zinc Oxide Nanocrystals", *Journal of Physical Chemistry B*, 2005, vol. 109 (30), pp 14314 to 14318
16. The Infrared Spectra Handbook of Inorganic Compounds, p. 165, Sadtler Research Laboratories, Philadelphia, PA (1984)
17. Luyuan Zhang et al "Sol-Gel Growth of Hexagonal Faceted ZnO Prism Quantum Dots with Polar Surfaces for Enhanced Photocatalytic Activity", *ACS Appl. Mater. Interfaces*, 2010, 2 (6), pp 1769-1773
18. Ziaul Raza Khan et al, "Optical and Structural Properties of ZnO Thin Films Fabricated by Sol-Gel Method", *Mater. Sci. Appl.*, 2011, 2, 340-345
19. Masanobu Izaki and Takashi Omi, "Characterization of Transparent Zinc Oxide Films Prepared by Electrochemical Reaction", *J. Electrochem. Soc.*, 1997, Vol. 144, No. 6, pp. 1949 - 1952
20. R.C. Perez, O.J. Sandoval, S.J. Sandoval, J.M. Marin, A.M. Galvan, G.T.Delgado," Influence of annealing temperature on the formation and characteristics of sol-gel prepared ZnO films", *J. Vac. Sci. Technol., A, Vac. Surf. Films*, 17 (1999) pp. 1811-1816
21. Wang, Minrui, et al. "Effect of preheating and annealing temperatures on quality characteristics of ZnO thin film prepared by sol-gel method." *Mater. chem. Phys.* (2006) 97-2, pp.219-225.
22. Bandyopadhyay, G.K. Paul, R. Roy, S.K. Sen, S. Sen, "Study of structural and electrical properties of grain-boundary modified ZnO films prepared by sol-gel technique", *Mater. Chem. Phys.* 74 (2002) pp. 83-91
23. D.W. Bahnmann, C. Kormann, M.R. Hoffmann, "Preparation and characterization of quantum size zinc oxide: a detailed spectroscopic study", *J. Phys. Chem.* (1987), 91 pp. 3789 - 3798



24. S.S. Alias, A.B. Ismail, A.A. Mohamad, "Effect of pH on ZnO nanoparticle properties synthesized by sol-gel centrifugation", *Journal of Alloys and Compounds* (2010), 499, pp. 231–237
25. Kwon, Yong Jae, Kyoung Hun Kim, and Chang Sung Lim. "Characterization of ZnO nanopowders synthesized by the polymerized complex method via an organochemical route", *J. Ceramic Processing Research* (2002), 3, pp. 146-149.
